# Supplementary material
Source: Springer Nature journal article supplement (https://www.springermedizin.de/resource/supplementary/12876_2007_242_MOESM6_ESM.pdf/9439108)

Figure 5b.

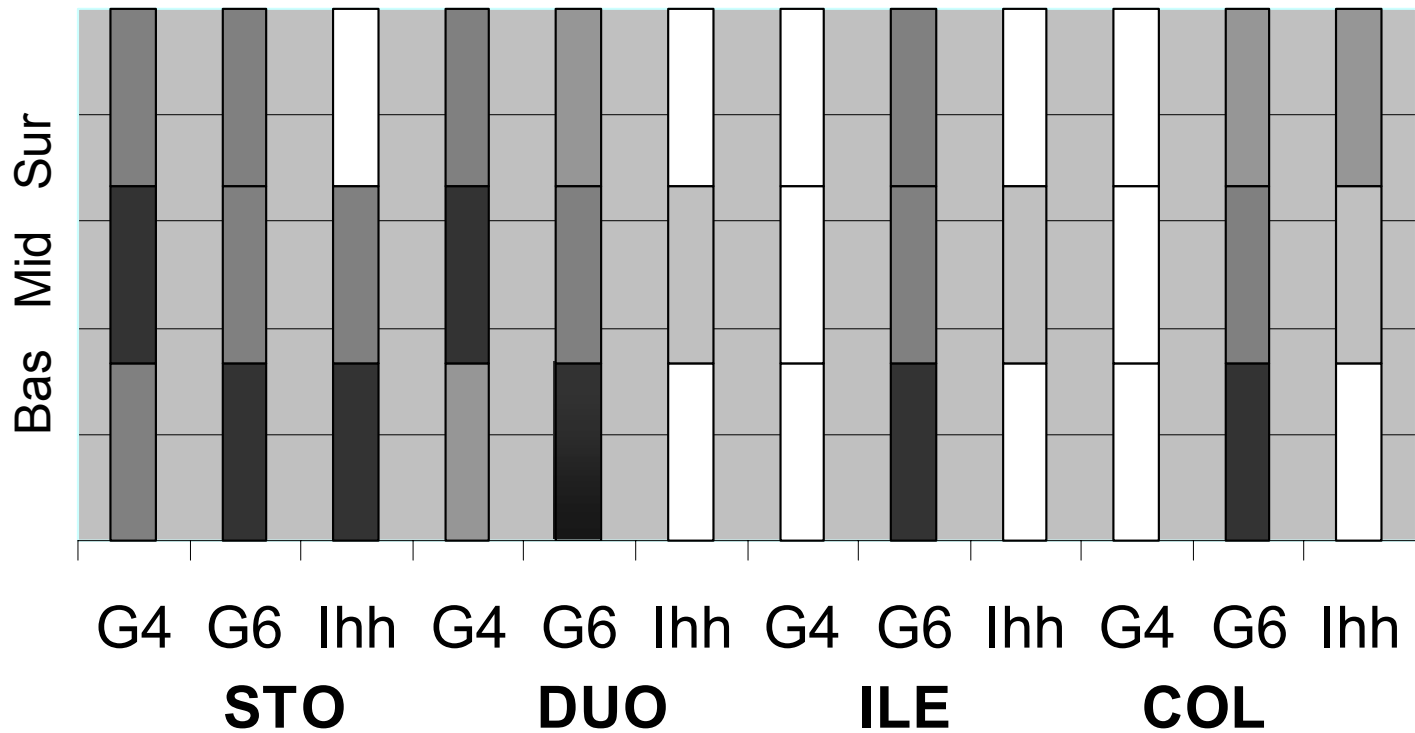

Supplement: MOESM6 [file 9439108]
